# Supplementary material for: PharmDB-K: Integrated Bio-Pharmacological Network Database for Traditional Korean Medicine
Source: PLoS One. 2015 Nov 10;10(11):e0142624. doi: 10.1371/journal.pone.0142624 (PMC4640719; doi:10.1371/journal.pone.0142624)
Supplement: S1 Table — (XLSX) [file pone.0142624.s001.xlsx]

## Sheet: Table1
S1 Table. Data Resources
Category	Database	URL
Relation Sources	MINT	ftp://mint.bio.uniroma2.it/pub/release/mitab26/
	T3DB	http://www.t3db.ca/downloads
	DIP	http://dip.doe-mbi.ucla.edu/dip/
	TTD	http://bidd.nus.edu.sg/group/TTD/ttd.asp
	OMIM	ftp://ftp.ncbi.nih.gov/repository/OMIM/ARCHIVE/
	MATADOR	http://matador.embl.de/
	GAD	http://geneticassociationdb.nih.gov/
	DrugBank	http://www.drugbank.ca/downloads
	SIDER	http://sideeffects.embl.de/download/
	ChEMBL	ftp://ftp.ebi.ac.uk/pub/databases/chebi/
	CTD	http://ctdbase.org/downloads/
	DCDB	http://www.cls.zju.edu.cn/dcdb/download.jsf
	Entrez Gene Interactions	ftp://ftp.ncbi.nih.gov/gene/GeneRIF/
Reference DBs	Korean Traditional Knowledge Portal	http://www.koreantk.com/ktkp2014/
	PubChem	ftp://ftp.ncbi.nlm.nih.gov/pubchem/
	Entrez Gene	ftp://ftp.ncbi.nih.gov/gene/DATA
	MeSH	https://www.nlm.nih.gov/mesh/filelist.html
Indicator Sources	six Pharmacopoeias	Data were kindly provided by Dr. Go-Ya Choi (Korea Institute of Oriental Medicine, serparas@kiom.re.kr)
